# Supplementary material for: Vinylene and benzo[c][1,2,5]thiadiazole: effect of the π-spacer unit on the properties of bis(2-oxoindolin-3-ylidene)-benzodifuran-dione containing polymers for n-channel organic field-effect transistors
Source: Royal Society of Chemistry journal article supplement (doi:10.1039/c8ra08890j), 2018-01-01
Supplement: c8ra08890j1.pdf [file c8ra08890j1.pdf]

## Supporting Information

### **Vynylene and Benzo[*c*][1,2,5]thiadiazole: Effect of the $\pi$ -Spacer Unit on the Properties of Bis(2-oxoindolin-3-ylidene)-benzodifuran-dione Containing Polymers for n-Channel Organic Field-Effect Transistors**

*Thu Trang Do,<sup>a#</sup> Basanagouda B Patil,<sup>a#</sup> Samarendra P. Singh,<sup>b</sup> Soniya D. Yambem,<sup>a</sup>*

*Krishna Feron,<sup>c,d</sup> Kostya (Ken) Ostrikov,<sup>a</sup> John M. Bell,<sup>a</sup> Prashant Sonar<sup>a\*</sup>*

<sup>a</sup>School of Chemistry, Physics and Mechanical Engineering, Queensland University of Technology (QUT), 2 George Street, Brisbane, QLD-4001, Australia.

<sup>b</sup>Department of Physics, School of Natural Sciences, Shiv Nadar University (SNU), Gautam Buddha Nagar, Uttar Pradesh, India-201307

<sup>c</sup>CSIRO Energy Centre, NSW-2304, Australia.

<sup>d</sup>Centre for Organic Electronics, University of Newcastle, Callaghan, NSW 2308, Australia.

<sup>#</sup> Both authors contributed equally to this work

Corresponding email: [sonar.prashant@qut.edu.au](mailto:sonar.prashant@qut.edu.au)

**KEYWORDS:** Bis(2-oxoindolin-3-ylidene)-benzodifuran-dione, (*E*)-2-(2-(thiophen-2-yl)vinyl)thiophene (TVT), dithienylbenzothiadiazole (TBT), D-A polymers, n-channel Organic Field-Effect Transistors (OFETs).

## Contents

1. Figure S1.  $^1\text{H}$  NMR (600 MHz,  $\text{CDCl}_3$ ) spectrum of **1**
2. Figure S2.  $^1\text{H}$  NMR (600 MHz,  $\text{CDCl}_3$ ) spectrum of **3**
3. Figure S3.  $^1\text{H}$  NMR (600 MHz,  $\text{CDCl}_3$ ) spectrum of **4**
4. Figure S4.  $^1\text{H}$  NMR (600 MHz,  $\text{CDCl}_3$ ) spectrum of **BIBDF**
5. Figure S5.  $^{13}\text{C}$  NMR (150 MHz,  $\text{CDCl}_3$ ) spectrum of **BIBDF**
6. Figure S6. HRMS spectrum of **BIBDF**
7. Figure S7. Gel permeation chromatogram of polymer **PIBDF-TVT** in chloroform at 30°C.
8. Figure S8. Gel permeation chromatogram of polymer **PIBDF-TBT** in chloroform at 30°C.
9. Figure S9. UV-Vis absorption spectra of **PBIBDF-TVT** and **PBIBDF-TBT** thin films at RT and 180 °C.
10. Figure S10. Powder X-ray diffraction (XRD) Patterns at RT and after annealing at 180°C for **PBIBDF-TVT** and **PBIBBDF-TBT** polymers.
11. Figure S11. XPS survey spectrum of **PBIBDF-TVT** and **PBIBDF-TBT**
12. Figure S12. Polymers are aggregated in the mixture of chlorobenzene and DCM (7:3 v/v)

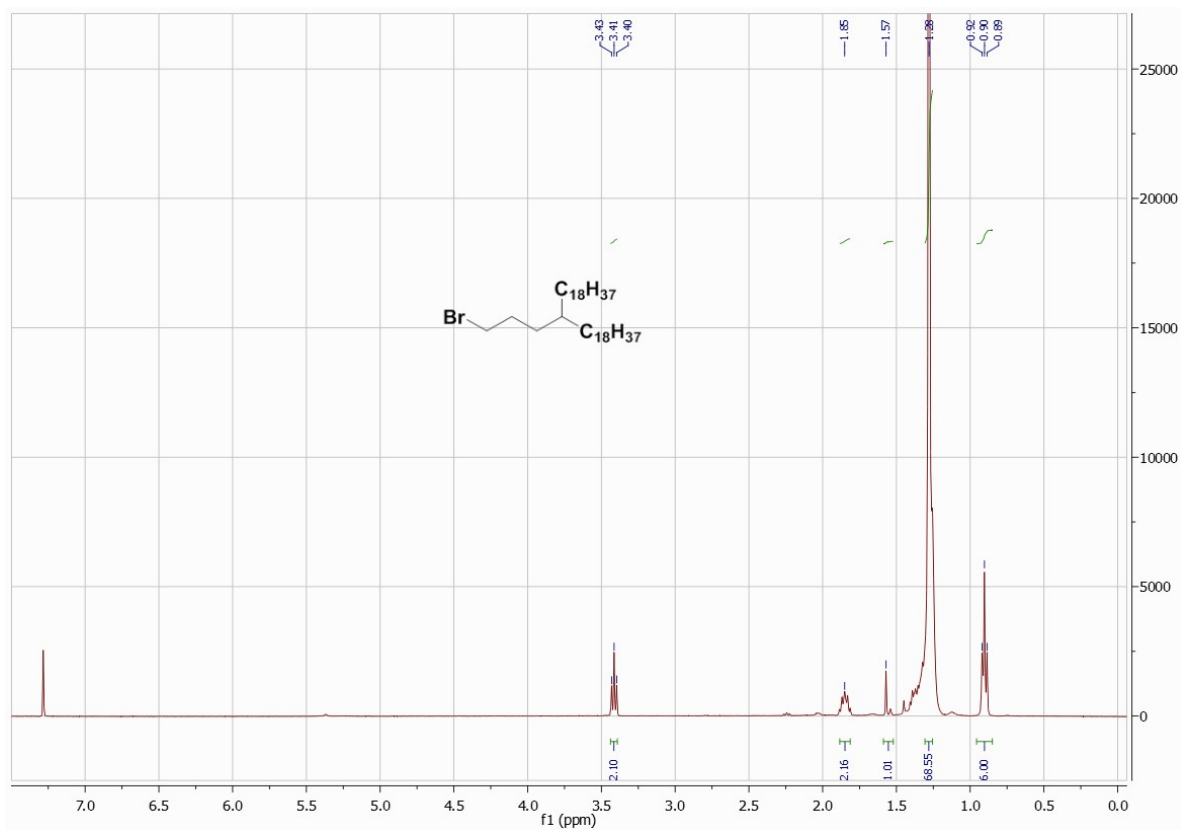

Figure S1. <sup>1</sup>H NMR (600 MHz, CDCl<sub>3</sub>) spectrum of **1**

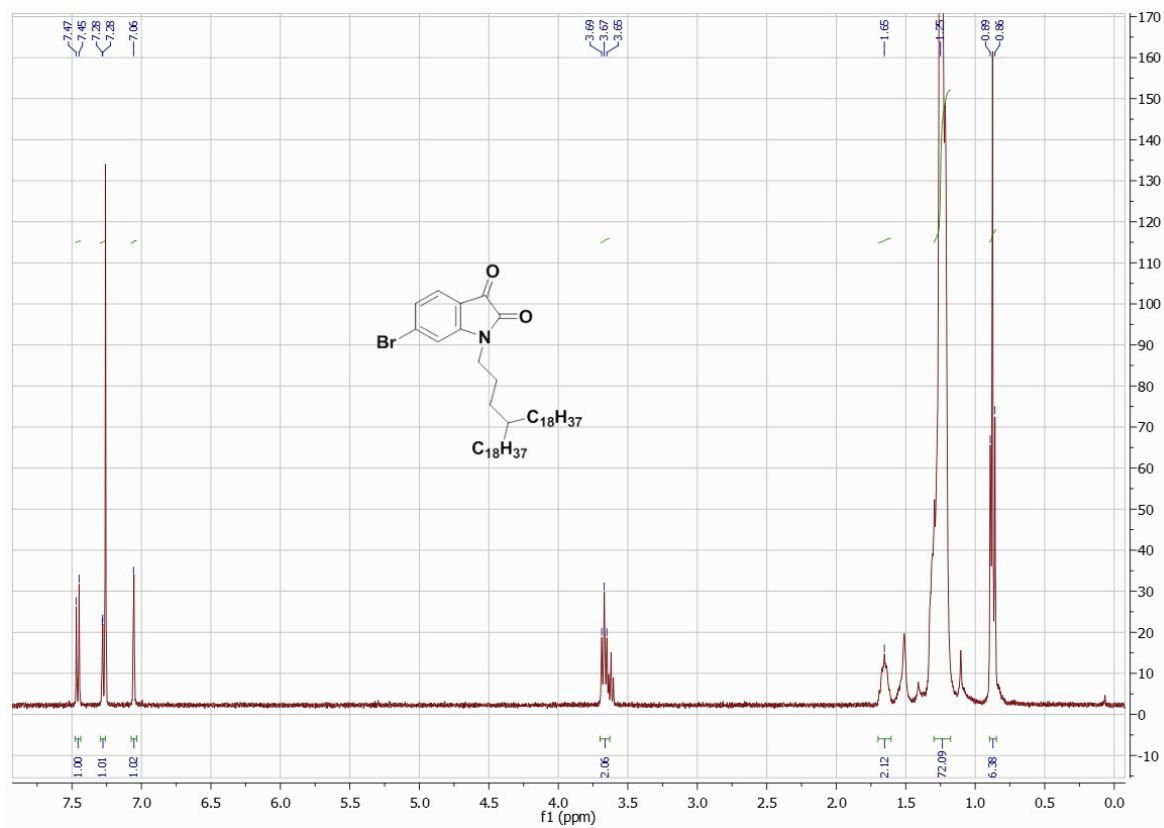

Figure S2. <sup>1</sup>H NMR (600 MHz, CDCl<sub>3</sub>) spectrum of **3**

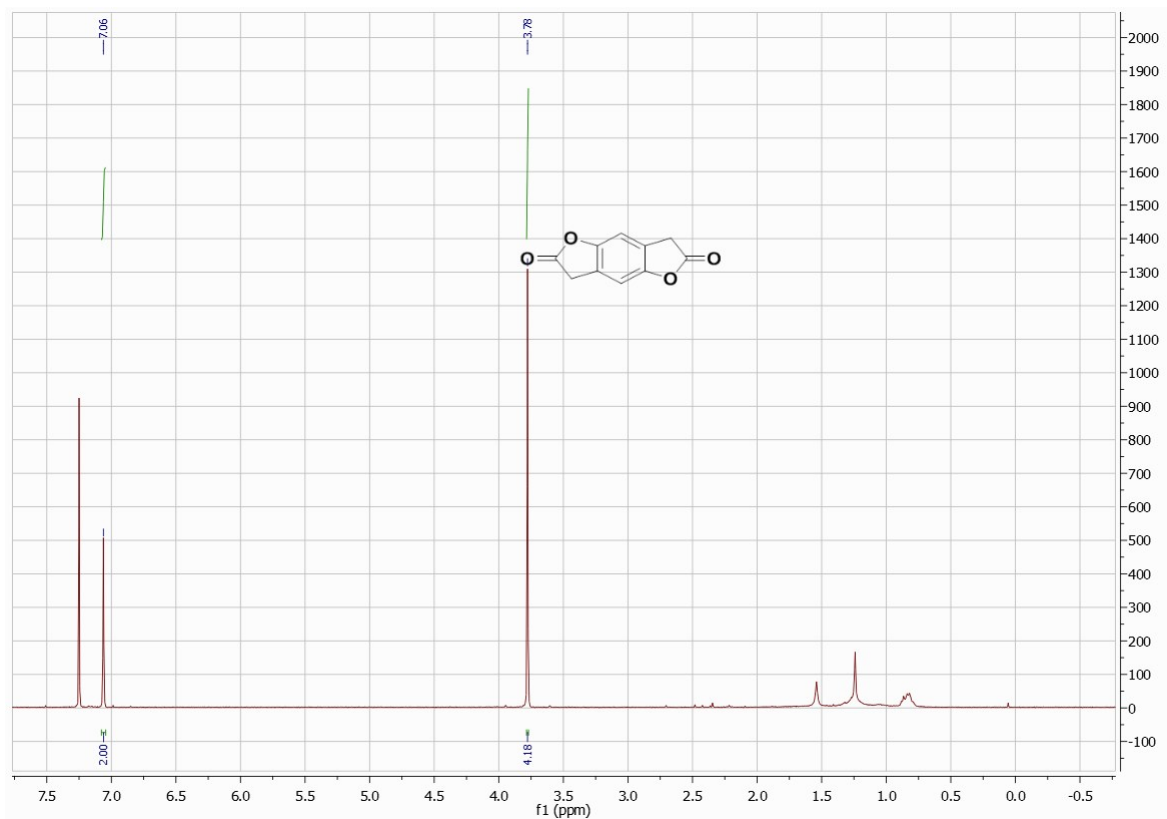

Figure S3. <sup>1</sup>H NMR (600 MHz, CDCl<sub>3</sub>) spectrum of **4**

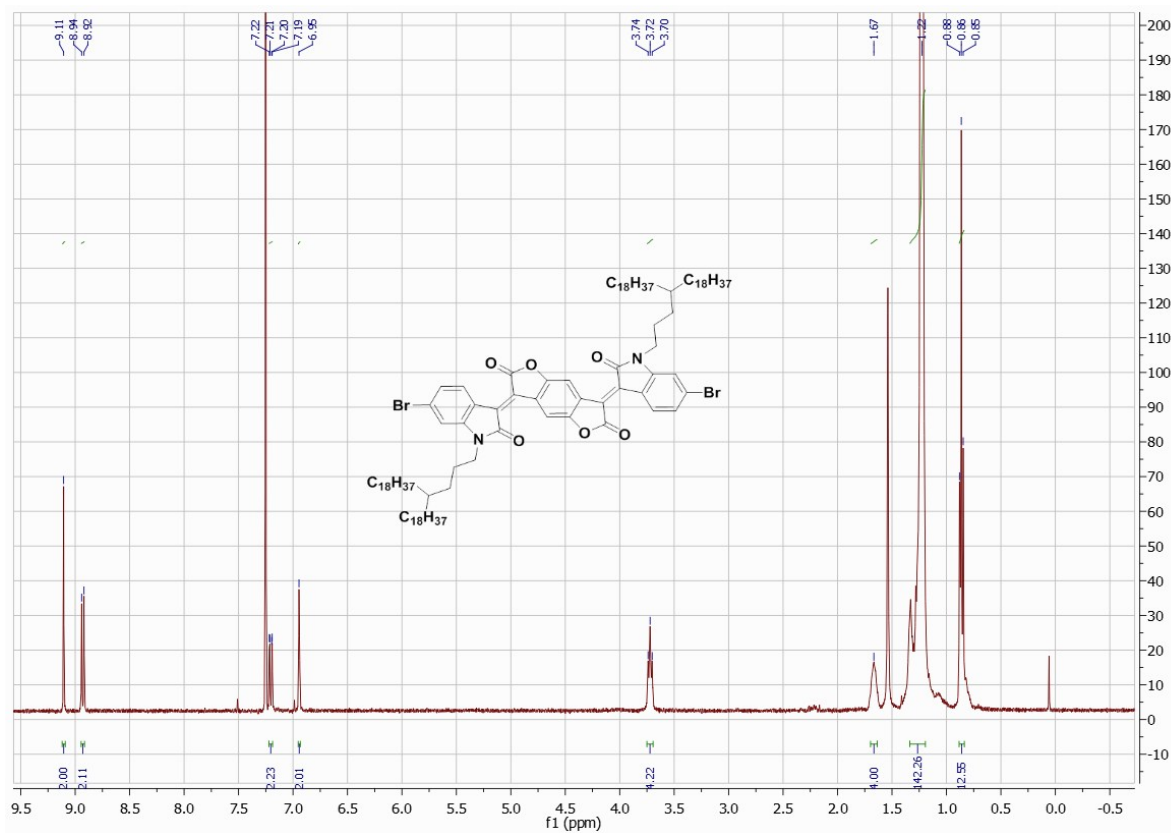

Figure S4. <sup>1</sup>H NMR (600 MHz, CDCl<sub>3</sub>) spectrum of **BIBDF**

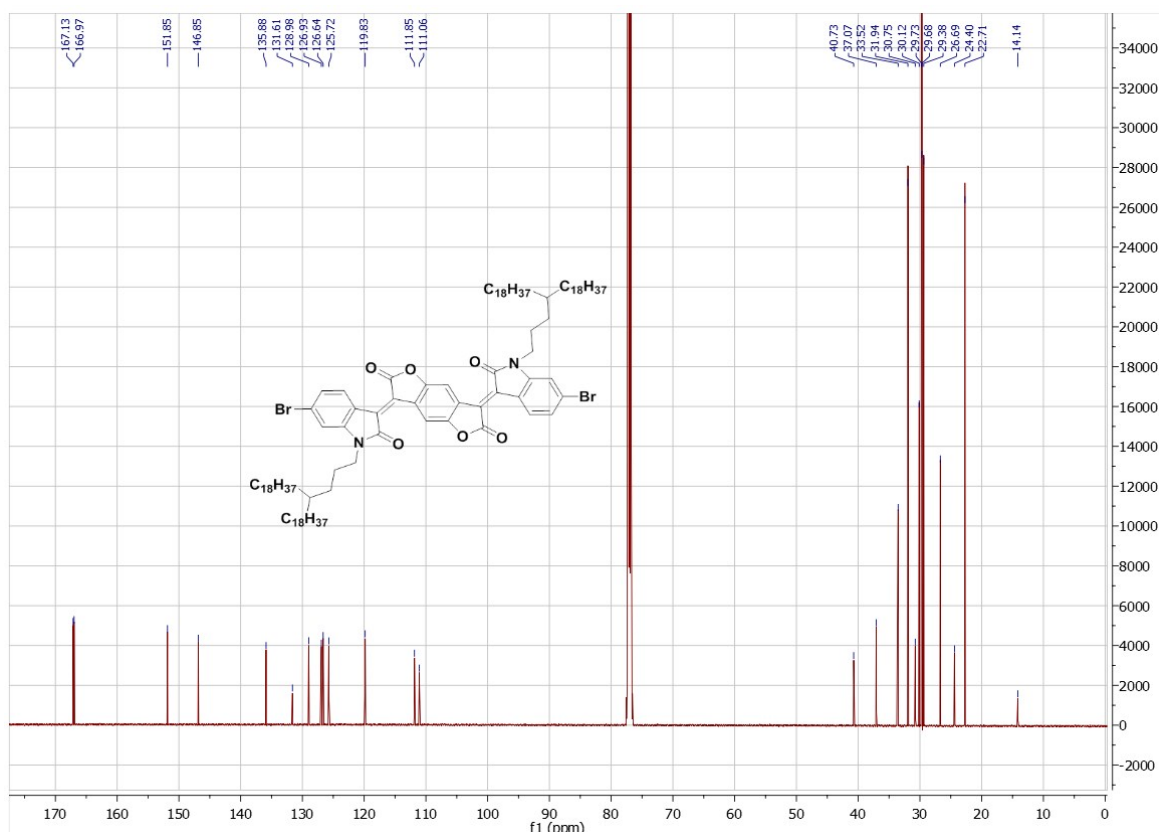

Figure S5.  $^{13}\text{C}$  NMR (150 MHz,  $\text{CDCl}_3$ ) spectrum of **BIBDF**

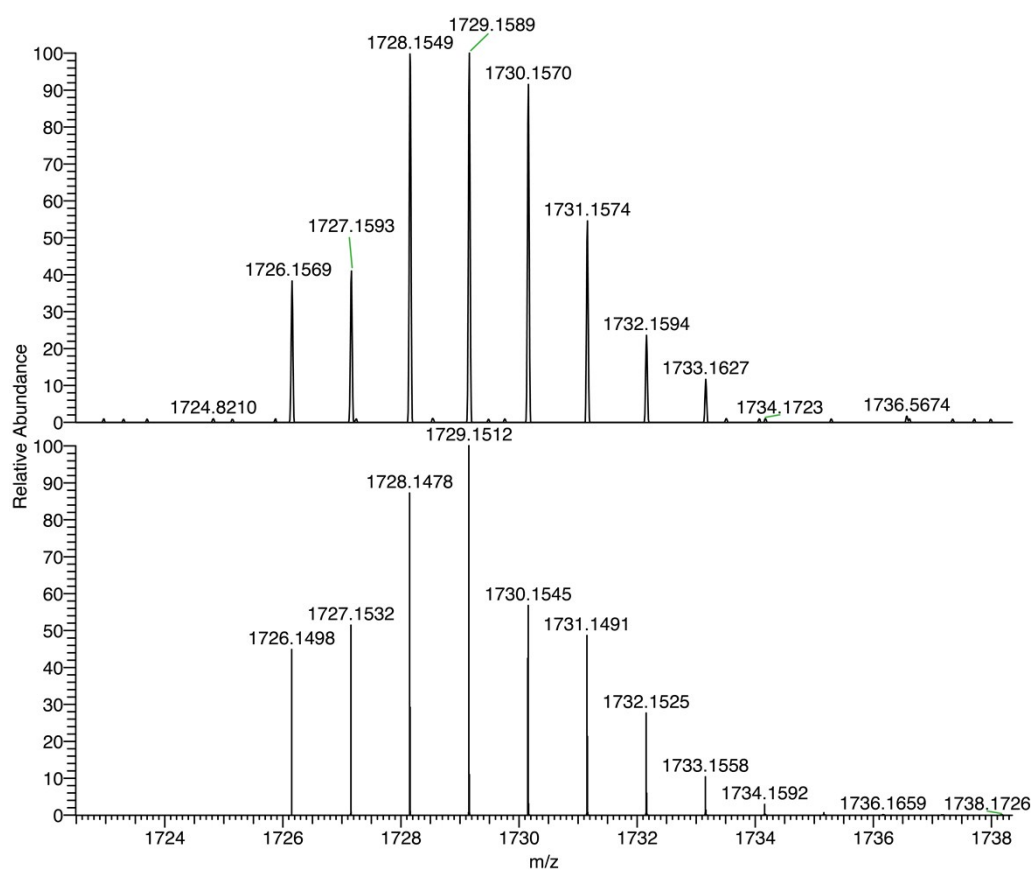

Figure S6. HRMS spectrum of **BIBDF**

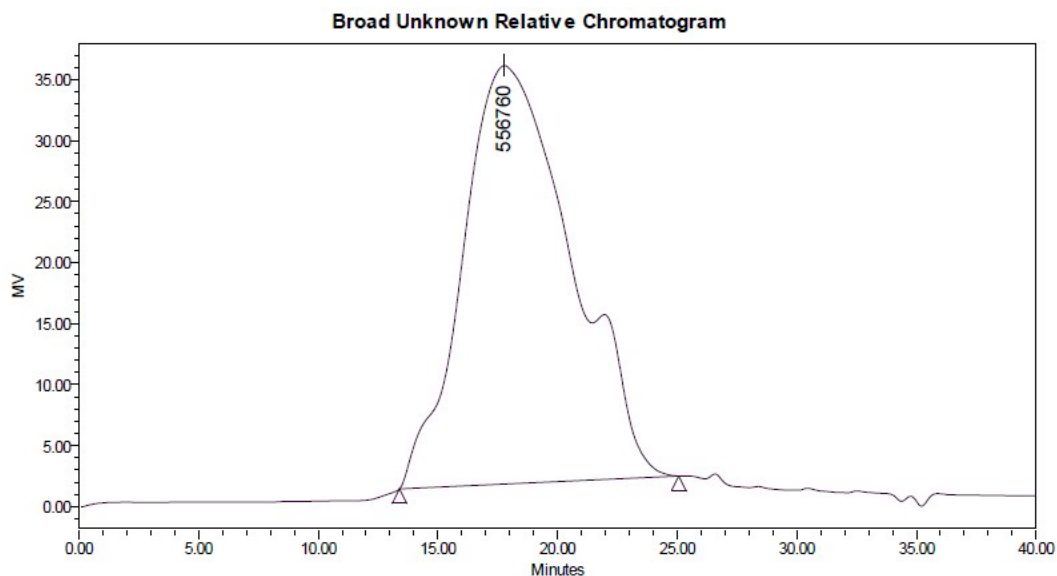

**Broad Unknown Relative Peak Table**

| Distribution Name | Mn (Daltons) | Mw (Daltons) | MP (Daltons) | Mz+1 (Daltons) | Polydispersity | Mz/Mw    | Mz+1/Mw  |
|-------------------|--------------|--------------|--------------|----------------|----------------|----------|----------|
| 1                 | 173529       | 870172       | 556760       | 7743232        | 5.014567       | 4.229790 | 8.898509 |

Figure S7. Gel permeation chromatogram of polymer **PIBDF-TVT** in chloroform at 30°C.

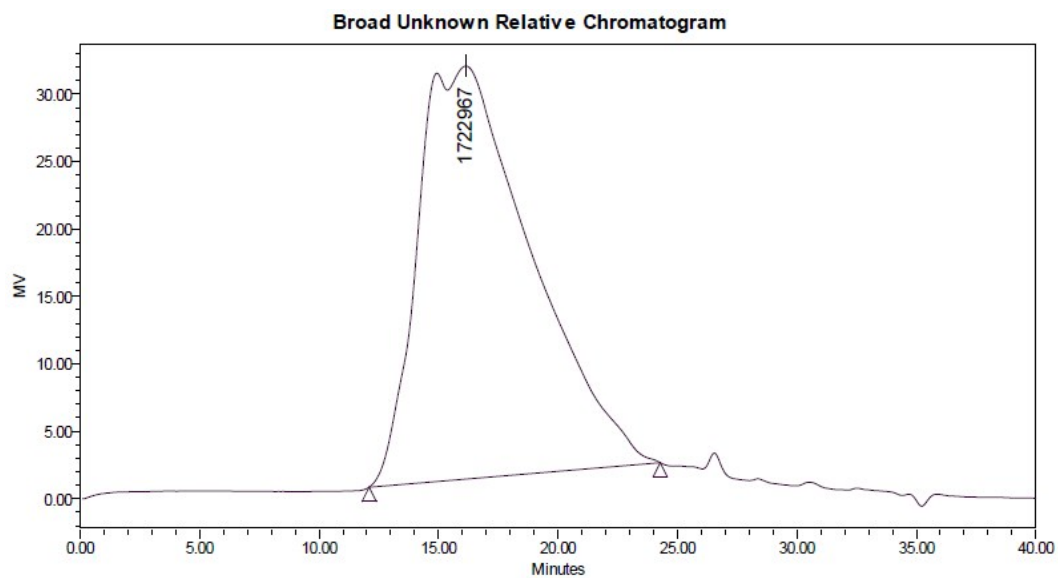

**Broad Unknown Relative Peak Table**

| Distribution Name | Mn (Daltons) | Mw (Daltons) | MP (Daltons) | Mz+1 (Daltons) | Polydispersity | Mz/Mw    | Mz+1/Mw  |
|-------------------|--------------|--------------|--------------|----------------|----------------|----------|----------|
| 1                 | 360648       | 3064874      | 1722967      | 25140504       | 8.498248       | 3.959119 | 8.202786 |

Figure S8. Gel permeation chromatogram of polymer **PIBDF-TBT** in chloroform at 30°C.

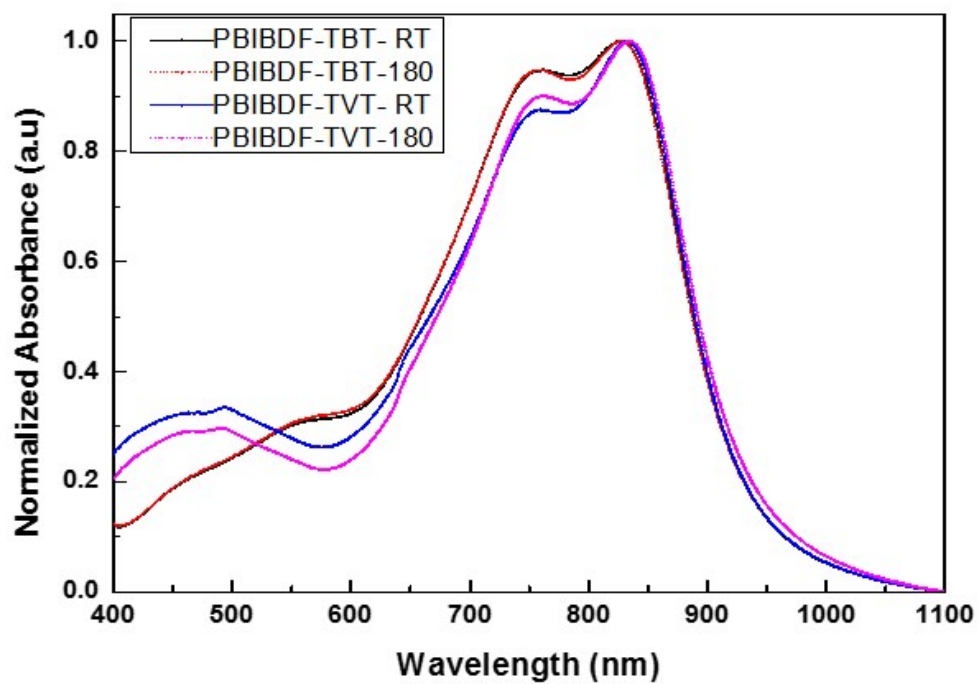

Figure S9. UV-Vis absorption spectra of **PBIBDF-TVT** and **PBIBDF-TBT** thin films at RT and 180 °C.

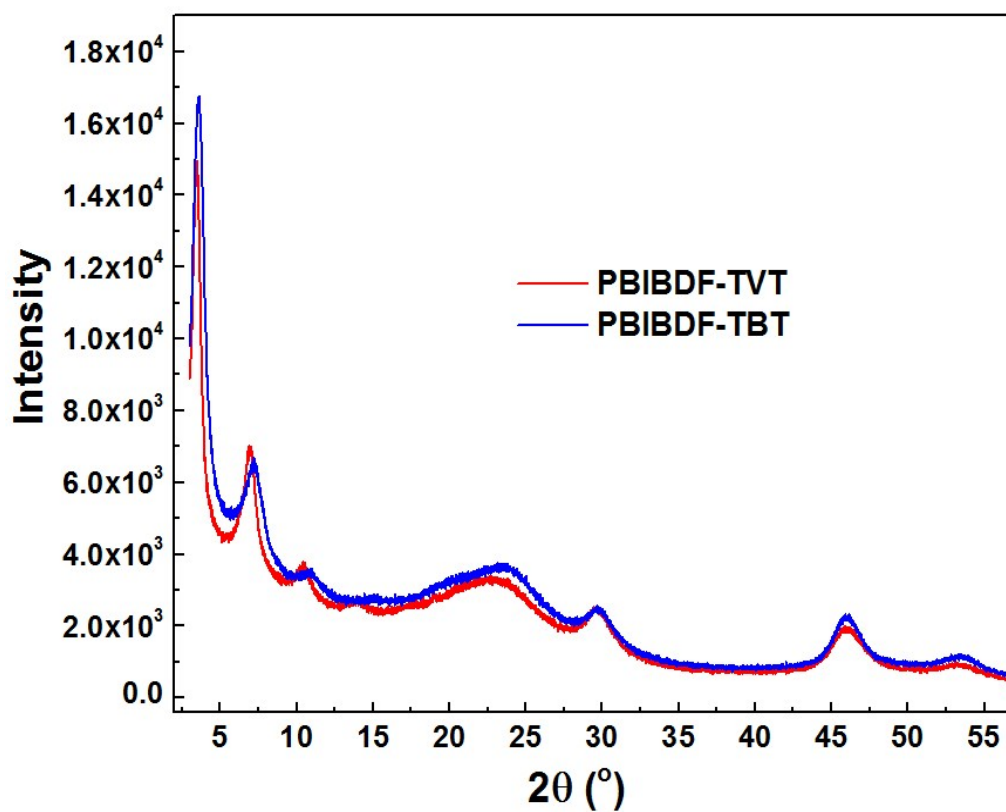

Figure S10. Powder X-ray diffraction (XRD) Patterns at RT and after annealing at 180°C for **PBIBDF-TVT** and **PBIBDF-TBT** polymers.

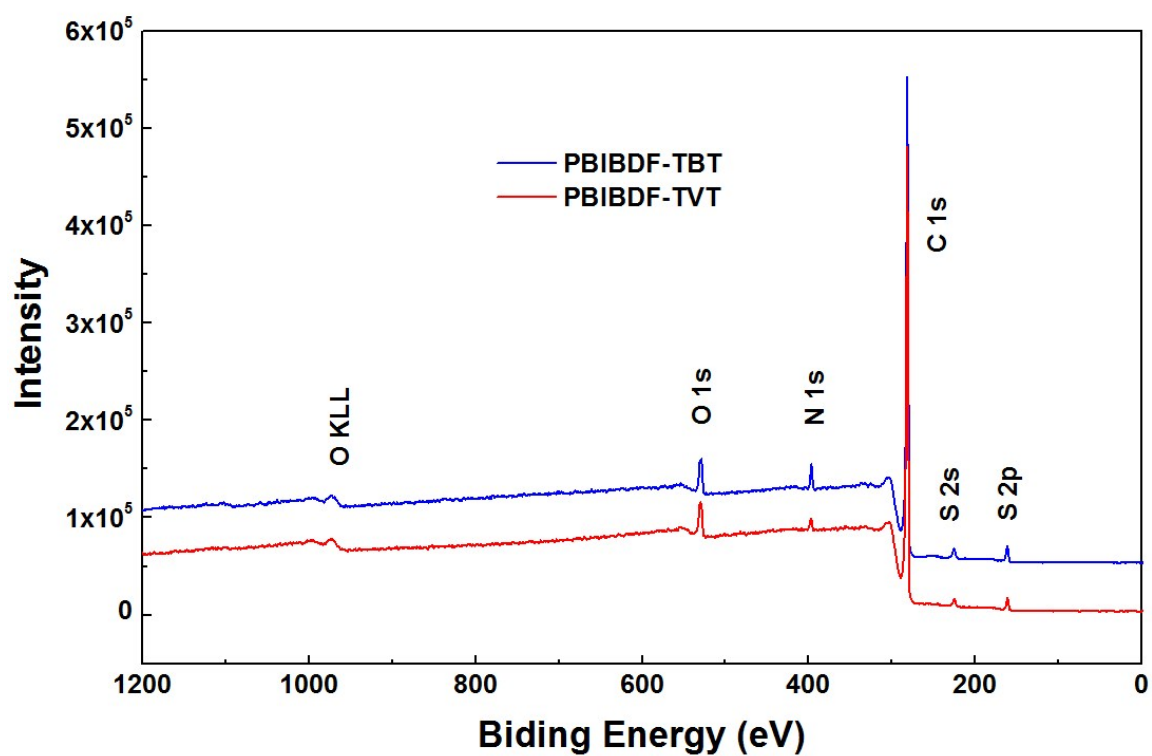

Figure S11. XPS survey spectrum of **PBIBDF-TVT** and **PBIBDF-TBT**

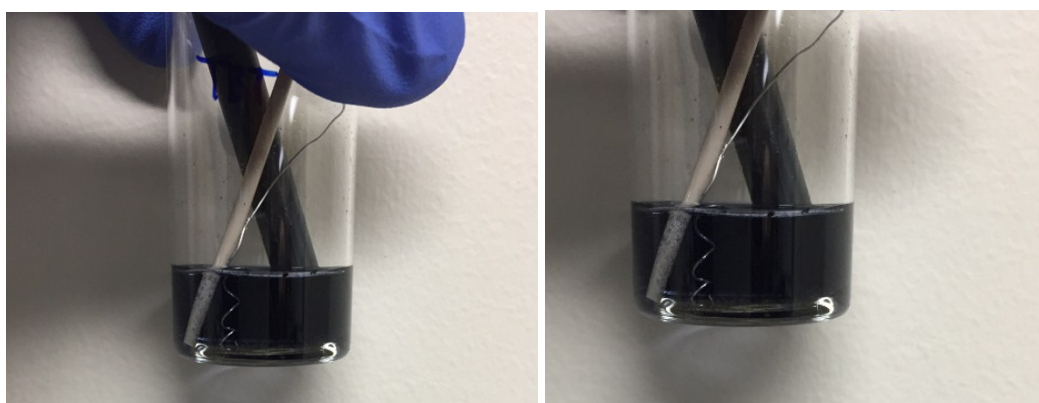

Figure S12. Polymers are aggregated in the mixture of chlorobenzene and DCM (7:3 v/v)  
**PBIBDF-TVT** (left) and **PBIBDF-TBT** (right)
